# Supplementary material for: Telehealth use in primary healthcare collaborative interprofessional practice: protocol for a scoping review
Source: PubMed Central journal article supplement — BMJ Open. 2023 Mar 17;13(3):e069163. doi: 10.1136/bmjopen-2022-069163 (PMC10030669; doi:10.1136/bmjopen-2022-069163), 2023-03-17
Supplement: bmjopen-2022-069163.draft_revisions.pdf [file bmjopen-2022-069163.draft_revisions.pdf]

# BMJ Open

BMJ Open is committed to open peer review. As part of this commitment we make the peer review history of every article we publish publicly available.

When an article is published we post the peer reviewers' comments and the authors' responses online. We also post the versions of the paper that were used during peer review. These are the versions that the peer review comments apply to.

The versions of the paper that follow are the versions that were submitted during the peer review process. They are not the versions of record or the final published versions. They should not be cited or distributed as the published version of this manuscript.

BMJ Open is an open access journal and the full, final, typeset and author-corrected version of record of the manuscript is available on our site with no access controls, subscription charges or pay-per-view fees (<http://bmjopen.bmj.com>).

If you have any questions on BMJ Open's open peer review process please email [info.bmjopen@bmj.com](mailto:info.bmjopen@bmj.com)

# BMJ Open

## Telehealth use in Primary Health Care collaborative interprofessional practice: protocol for a scoping review

|                               |                                                                                                                                                                                                                                                                                                                                                                                                           |
|-------------------------------|-----------------------------------------------------------------------------------------------------------------------------------------------------------------------------------------------------------------------------------------------------------------------------------------------------------------------------------------------------------------------------------------------------------|
| Journal:                      | <i>BMJ Open</i>                                                                                                                                                                                                                                                                                                                                                                                           |
| Manuscript ID                 | bmjopen-2022-069163                                                                                                                                                                                                                                                                                                                                                                                       |
| Article Type:                 | Protocol                                                                                                                                                                                                                                                                                                                                                                                                  |
| Date Submitted by the Author: | 12-Oct-2022                                                                                                                                                                                                                                                                                                                                                                                               |
| Complete List of Authors:     | Belber, Gisele; University of Sao Paulo, School of Nursing<br>Vasconcelos, Raíssa ; University of Sao Paulo, School of Nursing<br>Agreli, Heloise ; University of Sao Paulo, School of Nursing<br>Haddad, Ana Estela; University of Sao Paulo, Faculty of Dentistry<br>Peduzzi, Marina; University of Sao Paulo, School of Nursing<br>Leonello, Valéria Marli; University of Sao Paulo, School of Nursing |
| Keywords:                     | Telemedicine < BIOTECHNOLOGY & BIOINFORMATICS, PRIMARY CARE, PUBLIC HEALTH                                                                                                                                                                                                                                                                                                                                |
|                               |                                                                                                                                                                                                                                                                                                                                                                                                           |

SCHOLARONE™  
Manuscripts

1  
2  
3  
4 **Telehealth use in Primary Health Care collaborative interprofessional practice:**  
5 **protocol for a scoping review**  
6  
7  
8  
9  
10  
11  
12

13 Gisele Silvestre Belber <sup>1</sup>, Raíssa Ottés Vasconcelos <sup>1</sup>, Heloíse Lima Fernandes Agreli <sup>1</sup>,  
14 Ana Estela Haddad <sup>2</sup>, Marina Peduzzi <sup>1</sup>, Valéria Marli Leonello <sup>1</sup>  
15  
16

17 <sup>1</sup> Department for Professional Guidance, School of Nursing, University of São Paulo,  
18 São Paulo, Brazil; <sup>2</sup> Faculty of Dentistry, University of São Paulo, São Paulo, Brazil  
19  
20

21 Correspondence to: Gisele Silvestre Belber. [gi.belber@usp.br](mailto:gi.belber@usp.br). University of São Paulo.  
22  
23  
24  
25  
26

27 **Abstract**

28 **Introduction** Telehealth is a growing topic, with potential to improve access to Primary  
29 Health Care. However, there is a lack of knowledge regarding how telehealth could  
30 facilitate interprofessional collaboration that is recommended to strengthen the  
31 comprehensive approach of Primary Health Care. The objective is to identify the  
32 characteristics and applications of telehealth services related to the interprofessional  
33 collaboration practice of Primary Health Care professionals.  
34  
35  
36  
37  
38  
39

40 **Methods and Analysis** This review will cover studies including as target population  
41 those health professionals who work in telehealth services; as concept, telehealth in  
42 relation to collaboration interprofessional practice; and as context, Primary Health Care.  
43 A scoping review will be carried out according to the JBI methodology. Databases to be  
44 searched include MEDLINE, CINAHL, Embase, Eric, Scopus, Lilacs and Web of  
45 Science. All identified records will be grouped, duplicates will be removed, titles and  
46 abstracts will be selected by two independent reviewers, and the full text of selected  
47 articles will be evaluated in detail. A data extraction tool developed by the reviewers will  
48 be used for data extraction. The results will be presented in data map format in a logical  
49 way, in a diagram or in a tabular format, accompanied by a descriptive summary.  
50  
51  
52  
53  
54  
55  
56  
57  
58  
59  
60

**Ethics and Dissemination** No ethical approval is required for this study. A manuscript based on this scoping review will be submitted to a journal and we hope it will contribute to scientific knowledge on the interprofessional field and key research findings will be sent to key events on Interprofessional Practice and Education.

**Systematic review registration** This scoping review was registered in the Open Science Framework (<https://doi.org/10.17605/OSF.IO/2BV8D>)

**Keywords** Primary Health Care; Interprofessional relations; Telemedicine; Scoping review.

#### **Strengths and limitations of this study:**

- The aim of this scoping review is to evaluate, for the first time, the characteristics of telehealth related to collaborative interprofessional practice in Primary Health Care settings;
- We will use a methodological framework proposed by the Joanna Briggs Institute (JBI) for the scoping review;
- Relevant sources will be retrieved in full into the JBI System for Unified Management Document, Assessment and Review Information (JBI SUMARI);
- The research follows the Preferred Reporting Items for Systematic Reviews and Meta-analyses for Scope Reviews (PRISMA-ScR);
- The different types of concepts related to telehealth and interprofessional collaboration can make it difficult to search the publications and synthesize the results.

## **INTRODUCTION**

Telehealth is a broad term that refers to the use of different information and communication technologies for the remote delivery of health services. Its aim is bringing together and integrating health professionals, teams and services to increase patients' access to health care, especially to those whose access is unavailable or limited (1). In this sense, it is understood as a device that improves the quality of access to health services. Through telehealth, professionals and health teams from different geographic locations can collaborate and share evaluation methods, diagnosis, treatment, monitoring,

1  
2  
3 screening, and carry out interconsultations and matrix support in order to monitor and  
4 take care of patients (2).

5  
6  
7  
8 Telehealth can provide additional opportunities for patients to receive  
9 interprofessional care, in order to improve self-management and adherence to treatments  
10 (3). As the population ages and the prevalence of long-term conditions increases,  
11 telehealth is increasingly being used on team-based care delivery. Telehealth shows an  
12 effective way to tackle difficult problems by enabling virtual meets, through which  
13 interprofessional teams and patients can share decisions and agree upon a healthcare  
14 plan (2).  
15  
16  
17  
18  
19

20  
21 Telehealth, combined with interprofessional practice from different health areas,  
22 working together support the patients' integral treatment, becomes powerful in improving  
23 the team ability and interprofessional integration (4), it is capable to produce answer to  
24 several health problems in different meeting modalities and not just face-to-face.  
25  
26  
27

28  
29 In primary care, the most capillary level of health care and considered the  
30 preferred entry point for users to the health system, the additional benefits of telehealth  
31 are associated with the promotion of self-care, reduction in the number of home visits,  
32 with consequent cost reduction, saving patients time, improving clinical outcomes, better  
33 access to specialized services (5). The organization structure presented in the Primary  
34 Health Care (PHC) units that includes patients and families assigned to the teams, can  
35 contribute to interprofessional collaboration. PHC units thus emerge as the most efficient  
36 means of combating the fragmentation of actions in the health system, through  
37 interprofessional actions that overcome the team scope, bringing together patients and the  
38 community (6).  
39  
40  
41  
42  
43  
44  
45

46  
47 A recent study observed that the purpose of providing telehealth services in  
48 primary care is varied, including monitoring the disease, supervising and giving a second  
49 opinion, as well as training professionals and patients. However, the study identified that  
50 there are challenges for the implementation of telehealth in primary care related to  
51 equipment and internet network, regulation and license to perform telehealth, and the  
52 resistance of professionals to this approach (7).  
53  
54  
55  
56  
57

58  
59 In this perspective, it is essential to understand the characteristics related to the  
60 use of telehealth in the context of interprofessional collaboration (IPC) in PHC units. The

1  
2  
3 results of this review may help to understand the gaps in telehealth related to  
4 interprofessional teams in PHC, and ultimately, may contribute to formulate strategies to  
5 enforce and expand the use of telehealth by professionals, teams and health services.  
6  
7

8  
9 The aim of this study is to identify the characteristics and the applications of  
10 telehealth related to collaborative interprofessional practice in PHC settings.  
11  
12

13 A preliminary search was carried out in the Open Science Framework (OSF),  
14 Cochrane Database of Systematic Reviews, JBI Evidence Synthesis and Epistemonikos  
15 databases, and no current or ongoing systematic or scope reviews about the topic were  
16 identified, which also corroborates the need to carry out this scope review.  
17  
18  
19  
20  
21  
22  
23

## 24 **METHODS AND ANALYSIS**

25  
26  
27 This article reports on a protocol of a scoping review following the Joanna Briggs  
28 Institute (JBI) methodology for scoping assessments (8) to answer the review question:  
29 What are the characteristics and applications of telehealth in relation to interprofessional  
30 collaboration among health professionals in the context of Primary Health Care Units?  
31 The present protocol followed the Preferred Reporting Items for Systematic Reviews and  
32 Meta-Analyses Extension for Protocols (9) (online supplemental appendix I). This  
33 protocol of scoping review has been registered in the Open Science Framework  
34 (<https://doi.org/10.17605/OSF.IO/2BV8D>).  
35  
36  
37  
38  
39  
40  
41  
42  
43  
44

### 45 **Data sources**

46  
47 To identify publications in both peer-reviewed and grey literature, and provide a  
48 broad overview of the use of telehealth related to collaborative interprofessional practice,  
49 we will undertake a scoping review. Although scoping reviews differ from systematic  
50 reviews which focus on the effectiveness of a particular intervention, scoping reviews can  
51 also follow methodological frameworks, such as the one provided by the Joanna Briggs  
52 Institute (8). Relevant peer-reviewed literature will be identified through systematic  
53 searched in selected electronic databases: MEDLINE via PubMed, CINAHL, Embase,  
54 Eric, Scopus, Latin American and Caribbean Health Science Literature Database  
55  
56  
57  
58  
59  
60

1  
2  
3 (LILACS), Web of Science and grey literature databases such as DART-E, NLTD, Open  
4 Access Thesis and Dissertations (OATD).  
5

6  
7 The search strategy aims to find primary studies, reviews, articles, public policies,  
8 protocols, guidelines, grey literature and experience reports. A JBI three-step process will  
9 be followed for developing the search. The first of these steps has been already undertaken  
10 and involved an initial database search on MEDLINE and CINAHL. This step aimed to  
11 capture the index terms used to describe the articles and keywords contained in the title  
12 and abstracts of retrieved papers, using the terms telemedicine AND interprofessional  
13 practice AND primary health care. A detailed description of this search strategy is  
14 available in online supplemental appendix II. A second search using all identified  
15 keywords and index terms will then be undertaken across all selected databases  
16 (MEDLINE, CINAHL, Embase, Eric, Scopus, Lilacs, Web of Science). The search  
17 strategy includes all identified keywords and indexed terms will be adjusted to each  
18 database and/or information source included. On the third and final step, the reference  
19 lists of the selected studies will be searched for additional studies as well as a search for  
20 unpublished studies (grey literature). The search of the grey literature will be undertaken  
21 on DART-E, NLTD, Open Access Thesis and Dissertations (OATD) using the terms  
22 telemedicine AND interprofessional practice AND primary health care. A search of  
23 articles, public policies, protocols and guidelines will be undertaken on Google Scholar  
24 and Bielefeld Academic Search Engine (BASE). In these last sources, the first 20 results  
25 will be selected and screened.  
26  
27  
28  
29  
30  
31  
32  
33  
34  
35  
36  
37  
38  
39  
40

41 Articles in portuguese, english, french and italian are going to be considered  
42 because the authors' language domain. No restrictions on the publication period will be  
43 imposed.  
44  
45

46 The reviewers intend to contact the primary study's authors for more information,  
47 if necessary.  
48  
49  
50

## 51 52 53 54 **Inclusion criteria** 55 56 57 58 59 60

### *Participants*

This review will consider studies that include health professionals who participate in telehealth activities.

### *Concept*

We will consider studies that explore telehealth in relation to IPC.

### *Context*

This review will include studies carried out in the context of PHC.

### *Types of study to be included*

We will include study designs with quantitative, qualitative and mixed methods approaches.

### *Screening*

The titles and abstracts full text of the selected citations will be evaluated by two independent reviewers. Any disagreements that arise between reviewers in each step of the selection process will be resolved by discussion with a third reviewer.

### **Data extraction**

After the search, all documents identified will be separated into groups and managed by the EndNote Clarivate Analytics reference manager and any doubled document will be removed. All records will be imported to Rayyan to recheck duplicates and perform the blinded selection process (10). Potentially relevant sources will be retrieved in full, and their citation details imported into the JBI System for Unified Management Document, Assessment and Review Information (JBI SUMARI) (JBI, Adelaide, Australia) (11). The reasons for excluding full-text studies that are not in accordance to the including criteria will be recorded and reported in the scoping review. The research outcome and the including process will be reported in the final scoping



review and presented in a flowchart of Preferred Reporting Items for Systematic Reviews and Meta-analyses for Scope Reviews (PRISMA-ScR) (12).

Data will be extracted from documents included in the scoping review using a data extraction tool (table 1) previously developed by the reviewers. The extracted data will include specific details according to the inclusion criteria and that will be relevant to the review question.

The data extraction tool will be modified and reviewed if necessary, during the data extraction process of each included study. Modifications will be detailed in the scoping review. The authors of the articles will be contacted to request missing or additional data, when necessary. As this study consists of a scoping review any evaluation related to methodological quality will be taken.

**Table 1** Data Extraction Tool

| Aspects of extracted data              |                                                                                                                          |
|----------------------------------------|--------------------------------------------------------------------------------------------------------------------------|
| General information                    | Author<br>Title<br>Year of publication<br>Journal<br>Aim of study                                                        |
| Location                               | Country/City of origin                                                                                                   |
| Design of study                        | Empirical research, including quantitative, qualitative or mixed method                                                  |
| Type of population                     | Participants description                                                                                                 |
| Characteristics of the study refers to | Telehealth concept addressed in the study<br>Health care model addressed in the study<br>Interprofessional collaboration |
| Limitations                            | Limitations reported by authors                                                                                          |
| Results                                | Results founded                                                                                                          |
| Relevant aspects                       | Important aspects for the scoping review                                                                                 |

### Strategy for data synthesis

The results will be presented as a data map on a logical way, diagram or tabular format. A narrative abstract will come together with the tabulated and/or mapped results describing how the results are related to the purpose of the review and the research question. Results will be organized into categories.

## Critical appraisal of included studies

The reviewers will perform the critical appraisal of included studies using the Prediction Model Study Risk of Bias Assessment Tool, if applicable. We will classify risk of bias as low risk, high risk or unclear for each domain.

## Patient and public involvement

This scoping review has no direct involvement by patients or the general public, because there is no use of primary data collection.

## ETHICS AND DISSEMINATION

A manuscript based on this scoping review will be submitted to a journal and we hope it will contribute to scientific knowledge on the interprofessional field and key research findings will be sent to key events about Interprofessional Practice and Education.

**AUTHOR STATEMENT:** This manuscript was read, edited, revised and approved the final version by all authors.

**FUNDING:** This research received no specific grant from any funding agency in the public, commercial or not-for-profit sectors.

**CONFLICTS OF INTERESTS:** The authors declare no conflict of interest in this research.

## REFERENCES

1. Dorsey ER, Topol EJ. State of telehealth. *New England journal of medicine*. 2016;375(2):154-161;
2. Heuer A, Hector JR, Cassell V. An update on telehealth in allied health and interprofessional care. *J Allied Health*. 2019;48(2):140–7;
3. Taylor AM, Bingham J, Schussel K, Axon DR, Dickman DJ, Boesen K, et al. Integrating innovative telehealth solutions into an interprofessional team-delivered chronic care management pilot program. *J Manag Care Spec Pharm*. 2018;24(8):813–8;
4. Tostes JG, da Silva Tostes CB, Cruz RP, de Souza VS, Alves R. Teleconsultation and the challenges for maintaining health care in times of pandemic. *Revista Ciências em Saúde*. 2021;11(2): 5-9;
5. Zanotto BS et al. Economic evaluation of a telemedicine service for the expansion of primary health care in Rio Grande do Sul: the TeleOftalmo Project micro-funding. *Ciência & Saúde Coletiva*. 2020;25(4):1349- 1360;
6. Peduzzi M, Agreli H. Teamwork and collaborative practice in Primary Health Care. *Interface-Comunicação, Saúde, Educação* 2018;22: 1525-1543. DOI: 10.1590/1807-57622017.0827;
7. Beheshti L, Kalankesh LR, Doshmangir L, Farahbakhsh M. Telehealth in Primary Health Care: A Scoping Review of the Literature. *Perspect Health Inf Manag*. 2022;19(1):1n;
8. Peters MDJ, Godfrey C, McInerney P, Munn Z, Tricco AC, Khalil, H. Chapter 11: Scoping Reviews (2020 version). In: Aromataris E, Munn Z (Editors). *JBI Manual for Evidence Synthesis*, JBI, 2020. Available from: <https://synthesismanual.jbi.global>. <https://doi.org/10.46658/JBIMES-20-12>;
9. Moher D, Shamseer L, Clarke M, et al. Preferred reporting items for systematic review and meta-analysis protocols (PRISMA-P) 2015 statement. *Syst Rev* 2015;4:1;

10. Ouzzani M, Hammady H, Fedorowicz Z, et al. Rayyan-a web and mobile APP for systematic reviews. *Syst Rev* 2016;5:210;
11. Munn Z, Aromataris E, Tufanaru C, Stern C, Porritt K, Farrow J, et al. The development of software to support multiple systematic review types: the Joanna Briggs Institute System for the Unified Management, Assessment and Review of Information (JBI SUMARI). *Int J Evid Based Healthc* [Internet]. 2019;17(1):36–43. Disponível em: <https://insights.ovid.com/crossref?an=01787381-201903000-00005>;
12. Tricco AC, Lillie E, Zarin W, O'Brien KK, Colquhoun H, Levac D, Moher D, Peters MDJ, Horsley T, Weeks L, Hempel S, Akl EA, Chang C, McGowan J, Stewart L, Hartling L, Aldcroft A, Wilson MG, Garritty C, Lewin S, Godfrey CM, Macdonald MT, Langlois EV, Soares-Weiser K, Moriarty J, Clifford T, Tunçalp Ö, Straus SE. PRISMA Extension for Scoping Reviews (PRISMA-ScR): Checklist and Explanation. *Ann Intern Med*. 2018.

## Appendix I:

| Database | Search strategy                                                                                                                                                                                                                                                                                                                                                                                                                                                                                                                                                                                                                                                                                                                                                                                                                                                                                                                                                                                                                                                                                                                                                                                                                                                          |
|----------|--------------------------------------------------------------------------------------------------------------------------------------------------------------------------------------------------------------------------------------------------------------------------------------------------------------------------------------------------------------------------------------------------------------------------------------------------------------------------------------------------------------------------------------------------------------------------------------------------------------------------------------------------------------------------------------------------------------------------------------------------------------------------------------------------------------------------------------------------------------------------------------------------------------------------------------------------------------------------------------------------------------------------------------------------------------------------------------------------------------------------------------------------------------------------------------------------------------------------------------------------------------------------|
| CINAHL   | (MH "Telehealth") OR TI ( telehealth or telemedicine or telemonitoring or telepractice or telenursing or telecare or ehealth or e-health or mhealth or digital health or technology ) OR AB ( telehealth or telemedicine or telemonitoring or telepractice or telenursing or telecare or ehealth or e-health or mhealth or digital health or technology OR "remote consultation" ) AND (MH "Interprofessional Relations") OR TI ( "interprofessional collaboration" or "interprofessional teamwork" or "interprofessional practice" OR "interdisciplinary practice" OR "Interprofessional care" OR "interprofessional relations" OR "interprofessional team") OR AB ( "interprofessional collaboration" or "interprofessional teamwork" or "interprofessional practice" OR "interdisciplinary practice" OR "Interprofessional care" OR "interprofessional relations" OR "interprofessional team") AND (MH "Primary Health Care") OR TI ( "primary health care" or "primary care" OR "primary healthcare" or "primary care nursing" or "family medicine" or "family practice" or "general medicine" ) OR AB ( "primary health care" or "primary care" OR "primary healthcare" or "primary care nursing" or "family medicine" or "family practice" or "general medicine" ) |
| PubMed   | ((((("Remote Consultation"[Mesh] Consultation, Remote Teleconsultation Teleconsultations) OR ("Telemedicine"[Mesh] Mobile Health Health, Mobile mHealth Telehealth eHealth)) OR (telemonitoring or telepractice or telenursing or telecare or ehealth or e-health or mhealth or "digital health" or technology)) AND (("Interprofessional Relations"[Mesh] Relations, Interprofessional) OR ("interprofessional collaboration" or "interprofessional teamwork" or "interprofessional practice" OR "interdisciplinary practice" OR "Interprofessional care" OR "interprofessional relations" OR "interprofessional team")) AND ("Primary                                                                                                                                                                                                                                                                                                                                                                                                                                                                                                                                                                                                                                  |

|  |                                                                                                                                                                                                                                                                  |
|--|------------------------------------------------------------------------------------------------------------------------------------------------------------------------------------------------------------------------------------------------------------------|
|  | Health Care"[Mesh] OR "Primary Health Care"[tw] OR Care, Primary Health<br>Health Care, Primary Primary Healthcare Healthcare, Primary Primary Care<br>Care, Primary "primary care nursing" or "family medicine" or "family<br>practice" or "general medicine")) |
|--|------------------------------------------------------------------------------------------------------------------------------------------------------------------------------------------------------------------------------------------------------------------|

For peer review only

## Appendix II

### PRISMA-P (Preferred Reporting Items for Systematic review and Meta-Analysis Protocols) 2015 checklist: recommended items to address in a systematic review protocol\*

| Section and topic                 | Item No | Checklist item                                                                                                                                                                                                                | Location where item is reported |
|-----------------------------------|---------|-------------------------------------------------------------------------------------------------------------------------------------------------------------------------------------------------------------------------------|---------------------------------|
| <b>ADMINISTRATIVE INFORMATION</b> |         |                                                                                                                                                                                                                               |                                 |
| Title:                            |         |                                                                                                                                                                                                                               |                                 |
| Identification                    | 1a      | Identify the report as a protocol of a systematic review                                                                                                                                                                      | Page 1                          |
| Update                            | 1b      | If the protocol is for an update of a previous systematic review, identify as such                                                                                                                                            | Page 1                          |
| Registration                      | 2       | If registered, provide the name of the registry (such as PROSPERO) and registration number                                                                                                                                    | Page 2                          |
| Authors:                          |         |                                                                                                                                                                                                                               |                                 |
| Contact                           | 3a      | Provide name, institutional affiliation, e-mail address of all protocol authors; provide physical mailing address of corresponding author                                                                                     | Page 1                          |
| Contributions                     | 3b      | Describe contributions of protocol authors and identify the guarantor of the review                                                                                                                                           | Page 10                         |
| Amendments                        | 4       | If the protocol represents an amendment of a previously completed or published protocol, identify as such and list changes; otherwise, state plan for documenting important protocol amendments                               | Not applicable                  |
| Support:                          |         |                                                                                                                                                                                                                               |                                 |
| Sources                           | 5a      | Indicate sources of financial or other support for the review                                                                                                                                                                 | Page 10                         |
| Sponsor                           | 5b      | Provide name for the review funder and/or sponsor                                                                                                                                                                             | Not applicable                  |
| Role of sponsor or funder         | 5c      | Describe roles of funder(s), sponsor(s), and/or institution(s), if any, in developing the protocol                                                                                                                            | Not applicable                  |
| <b>INTRODUCTION</b>               |         |                                                                                                                                                                                                                               |                                 |
| Rationale                         | 6       | Describe the rationale for the review in the context of what is already known                                                                                                                                                 | Pages 2, 3 and 4                |
| Objectives                        | 7       | Provide an explicit statement of the question(s) the review will address with reference to participants, interventions, comparators, and outcomes (PICO)                                                                      | Page 4                          |
| <b>METHODS</b>                    |         |                                                                                                                                                                                                                               |                                 |
| Eligibility criteria              | 8       | Specify the study characteristics (such as PICO, study design, setting, time frame) and report characteristics (such as years considered, language, publication status) to be used as criteria for eligibility for the review | Page 6                          |
| Information sources               | 9       | Describe all intended information sources (such as electronic databases, contact with study authors, trial registers or other grey literature sources) with planned dates of coverage                                         | Pages 4 and 5                   |
| Search strategy                   | 10      | Present draft of search strategy to be used for at least one electronic database, including planned limits, such that it could be repeated                                                                                    | online supplemental Appendix I  |

|                                    |     |                                                                                                                                                                                                                                                  |                       |
|------------------------------------|-----|--------------------------------------------------------------------------------------------------------------------------------------------------------------------------------------------------------------------------------------------------|-----------------------|
| Study records:                     |     |                                                                                                                                                                                                                                                  |                       |
| Data management                    | 11a | Describe the mechanism(s) that will be used to manage records and data throughout the review                                                                                                                                                     | <b>Pages 6 and 7</b>  |
| Selection process                  | 11b | State the process that will be used for selecting studies (such as two independent reviewers) through each phase of the review (that is, screening, eligibility and inclusion in meta-analysis)                                                  | <b>Pages 6 and 7</b>  |
| Data collection process            | 11c | Describe planned method of extracting data from reports (such as piloting forms, done independently, in duplicate), any processes for obtaining and confirming data from investigators                                                           | <b>Pages 6 and 7</b>  |
| Data items                         | 12  | List and define all variables for which data will be sought (such as PICO items, funding sources), any pre-planned data assumptions and simplifications                                                                                          | <b>Page 7</b>         |
| Outcomes and prioritization        | 13  | List and define all outcomes for which data will be sought, including prioritization of main and additional outcomes, with rationale                                                                                                             | <b>Page 7</b>         |
| Risk of bias in individual studies | 14  | Describe anticipated methods for assessing risk of bias of individual studies, including whether this will be done at the outcome or study level, or both; state how this information will be used in data synthesis                             | <b>Page 8</b>         |
| Data synthesis                     | 15a | Describe criteria under which study data will be quantitatively synthesised                                                                                                                                                                      | <b>Not applicable</b> |
|                                    | 15b | If data are appropriate for quantitative synthesis, describe planned summary measures, methods of handling data and methods of combining data from studies, including any planned exploration of consistency (such as $I^2$ , Kendall's $\tau$ ) | <b>Not applicable</b> |
|                                    | 15c | Describe any proposed additional analyses (such as sensitivity or subgroup analyses, meta-regression)                                                                                                                                            | <b>Not applicable</b> |
|                                    | 15d | If quantitative synthesis is not appropriate, describe the type of summary planned                                                                                                                                                               | <b>Page 7</b>         |
| Meta-bias(es)                      | 16  | Specify any planned assessment of meta-bias(es) (such as publication bias across studies, selective reporting within studies)                                                                                                                    | <b>Not applicable</b> |
| Confidence in cumulative evidence  | 17  | Describe how the strength of the body of evidence will be assessed (such as GRADE)                                                                                                                                                               | <b>Not applicable</b> |

**\* It is strongly recommended that this checklist be read in conjunction with the PRISMA-P Explanation and Elaboration (cite when available) for important clarification on the items. Amendments to a review protocol should be tracked and dated. The copyright for PRISMA-P (including checklist) is held by the PRISMA-P Group and is distributed under a Creative Commons Attribution Licence 4.0.**

*From: Shamseer L, Moher D, Clarke M, Ghersi D, Liberati A, Petticrew M, Shekelle P, Stewart L, PRISMA-P Group. Preferred reporting items for systematic review and meta-analysis protocols (PRISMA-P) 2015: elaboration and explanation. BMJ. 2015 Jan 2;349(jan02 1):g7647.*



# BMJ Open

## Telehealth use in Primary Health Care collaborative interprofessional practice: protocol for a scoping review

|                                 |                                                                                                                                                                                                                                                                                                                                                                                                           |
|---------------------------------|-----------------------------------------------------------------------------------------------------------------------------------------------------------------------------------------------------------------------------------------------------------------------------------------------------------------------------------------------------------------------------------------------------------|
| Journal:                        | <i>BMJ Open</i>                                                                                                                                                                                                                                                                                                                                                                                           |
| Manuscript ID                   | bmjopen-2022-069163.R1                                                                                                                                                                                                                                                                                                                                                                                    |
| Article Type:                   | Protocol                                                                                                                                                                                                                                                                                                                                                                                                  |
| Date Submitted by the Author:   | 28-Dec-2022                                                                                                                                                                                                                                                                                                                                                                                               |
| Complete List of Authors:       | Belber, Gisele; University of Sao Paulo, School of Nursing<br>Vasconcelos, Raíssa ; University of Sao Paulo, School of Nursing<br>Agreli, Heloise ; University of Sao Paulo, School of Nursing<br>Haddad, Ana Estela; University of Sao Paulo, Faculty of Dentistry<br>Peduzzi, Marina; University of Sao Paulo, School of Nursing<br>Leonello, Valéria Marli; University of Sao Paulo, School of Nursing |
| <b>Primary Subject Heading</b>: | Public health                                                                                                                                                                                                                                                                                                                                                                                             |
| Secondary Subject Heading:      | General practice / Family practice, Health services research                                                                                                                                                                                                                                                                                                                                              |
| Keywords:                       | Telemedicine < BIOTECHNOLOGY & BIOINFORMATICS, PRIMARY CARE, PUBLIC HEALTH                                                                                                                                                                                                                                                                                                                                |
|                                 |                                                                                                                                                                                                                                                                                                                                                                                                           |

SCHOLARONE™  
Manuscripts

1  
2  
3  
4 **Telehealth use in Primary Health Care collaborative interprofessional practice:**  
5 **protocol for a scoping review**  
6  
7  
8  
9  
10  
11  
12

13 Gisele Silvestre Belber <sup>1</sup>, Raíssa Ottos Vasconcelos <sup>1</sup>, Heloíse Lima Fernandes Agreli <sup>1</sup>,  
14 Ana Estela Haddad <sup>2</sup>, Marina Peduzzi <sup>1</sup>, Valéria Marli Leonello <sup>1</sup>  
15  
16

17 <sup>1</sup> Department for Professional Guidance, School of Nursing, University of São Paulo,  
18 São Paulo, Brazil; <sup>2</sup> Faculty of Dentistry, University of São Paulo, São Paulo, Brazil  
19  
20

21 Correspondence to: Gisele Silvestre Belber. [gi.belber@usp.br](mailto:gi.belber@usp.br). University of São Paulo.  
22  
23  
24  
25  
26

27 **Abstract**

28 **Introduction** Telehealth is a growing topic, with potential to improve access to Primary  
29 Health Care. However, there is a lack of knowledge regarding how telehealth could  
30 facilitate interprofessional collaboration that is recommended to strengthen the  
31 comprehensive approach of Primary Health Care. The objective is to identify the  
32 characteristics and applications of telehealth services related to the interprofessional  
33 collaboration practice of Primary Health Care professionals.  
34  
35  
36  
37  
38

39 **Methods and Analysis** This review will cover studies including as target population  
40 those health professionals who work in telehealth services; as concept, telehealth in  
41 relation to collaboration interprofessional practice; and as context, Primary Health Care.  
42 A scoping review will be carried out according to the JBI methodology. Databases to be  
43 searched include MEDLINE, CINAHL, Embase, Eric, Scopus, Lilacs and Web of  
44 Science. All identified records will be grouped, duplicates will be removed, titles and  
45 abstracts will be selected by two independent reviewers, and the full text of selected  
46 articles will be evaluated in detail. A data extraction tool developed by the reviewers will  
47 be used for data extraction. The results will be presented in data map format in a logical  
48 way, in a diagram or in a tabular format, accompanied by a descriptive summary.  
49  
50  
51  
52  
53  
54  
55  
56  
57

58 **Ethics and Dissemination** No ethical approval is required for this study. A manuscript  
59 based on this scoping review will be submitted to a journal and we hope it will contribute  
60

1  
2  
3 to scientific knowledge on the interprofessional field and key research findings will be  
4 sent to key events on Interprofessional Practice and Education.  
5  
6

7 **Systematic review registration** This scoping review was registered in the Open Science  
8 Framework (<https://doi.org/10.17605/OSF.IO/2BV8D>)  
9  
10

11 **Keywords** Primary Health Care; Interprofessional relations; Telemedicine; Scoping  
12 review.  
13  
14

### 15 **Strengths and limitations of this study:**

- 16 ● We will use a methodological framework proposed by the Joanna Briggs Institute  
17 (JBI) for the scoping review;
- 18 ● Relevant sources will be retrieved in full into the JBI System for Unified  
19 Management Document, Assessment and Review Information (JBI SUMARI);
- 20 ● The research follows the Preferred Reporting Items for Systematic Reviews and  
21 Meta-analyses for Scope Reviews (PRISMA-ScR);
- 22 ● The different types of concepts related to telehealth and interprofessional  
23 collaboration can make it difficult to search the publications and synthesize the  
24 results.  
25  
26  
27  
28  
29  
30  
31  
32  
33  
34  
35  
36

## 37 **INTRODUCTION**

38  
39 Telehealth is a broad term that refers to the use of different information and  
40 communication technologies for the remote delivery of health services. Its aim is bringing  
41 together and integrating health professionals, teams and services to increase patients'  
42 access to health care, especially to those whose access is unavailable or limited (1). In  
43 this sense, it is understood as a device that improves the quality of access to health  
44 services. Through telehealth, professionals and health teams from different geographic  
45 locations can collaborate and share evaluation methods, diagnosis, treatment, monitoring,  
46 screening, and carry out interconsultations and matrix support in order to monitor and  
47 take care of patients (2).  
48  
49  
50  
51  
52  
53  
54

55  
56 Telehealth can provide additional opportunities for patients to receive  
57 interprofessional care, in order to improve self-management and adherence to treatments  
58 (3). As the population ages and the prevalence of long-term conditions increases,  
59  
60

1  
2  
3 telehealth is increasingly being used on team-based care delivery. Telehealth shows an  
4 effective way to tackle difficult problems by enabling virtual meets, through which  
5 interprofessional teams and patients can share decisions and agree upon a healthcare plan  
6  
7 (2).  
8  
9

10  
11 Morgan, Pullon and McKinlay define interprofessional collaboration (IPC) as an  
12 active and ongoing partnership, often among people from diverse backgrounds with  
13 distinct professional cultures and possibly representing different organizations or sectors,  
14 who work together to solve problems or provide services. In this context, they establish  
15 interprofessional collaborative practice as a term used to describe the elements of  
16 interprofessional collaboration implemented in the practice setting and belonging to an  
17 umbrella hierarchy term of the interprofessional collaboration (4). Reeves, Xyrichis and  
18 Zwarenstein argue that interprofessional collaboration is a more flexible form of  
19 interprofessional work, being similar to teamwork in that it requires shared responsibility  
20 and interdependence among individuals, in addition to clarity of roles and goals (5).  
21  
22  
23  
24  
25  
26  
27  
28

29 Telehealth, combined with IPC with different health areas, working together  
30 support the patients' integral treatment, becomes powerful in improving the team ability  
31 and interprofessional integration (6), it is capable to produce answers to several health  
32 problems in different meeting modalities and not just face-to-face.  
33  
34  
35  
36

37 In primary care, the most capillary level of health care and considered the  
38 preferred entry point for users to the health system, the additional benefits of telehealth  
39 are associated with the promotion of self-care, reduction in the number of home visits,  
40 with consequent cost reduction, saving patients time, improving clinical outcomes, better  
41 access to specialized services (7). The organization structure presented in the Primary  
42 Health Care (PHC) units that includes patients and families assigned to the teams, can  
43 contribute to IPC. PHC units thus emerge as the most efficient means of combating the  
44 fragmentation of actions in the health system, through interprofessional actions that  
45 overcome the team scope, bringing together patients and the community (8).  
46  
47  
48  
49  
50  
51  
52  
53

54 A recent study observed that the purpose of providing telehealth services in  
55 primary care is varied, including monitoring the disease, supervising and giving a second  
56 opinion, as well as training professionals and patients. However, the study identified that  
57 there are challenges for the implementation of telehealth in primary care related to  
58  
59  
60

1  
2  
3 equipment and internet network, regulation and license to perform telehealth, and the  
4 resistance of professionals to this approach (9).  
5  
6  
7

8 In this perspective, it is essential to understand the characteristics related to the  
9 use of telehealth in the context of IPC in PHC units. The results of this review may help  
10 to understand the gaps in telehealth related to interprofessional teams in PHC, and  
11 ultimately, may contribute to formulate strategies to enforce and expand the use of  
12 telehealth by professionals, teams and health services.  
13  
14  
15  
16

17 The aim of this study is to identify the characteristics and the applications of  
18 telehealth related to collaborative interprofessional practice in PHC settings.  
19  
20  
21

22 To define the characteristics related to the use of telehealth in the context of  
23 IPC, we will verify the properties of the type of telehealth tool reported in each study, as  
24 well as the experience of the interprofessional team members who participated and  
25 technology model used for management the health care of the patients in a PHC context.  
26  
27  
28  
29

30 To describe the characteristics related to IPC, we will use key references in the  
31 area, such as the 2010 World Health Organization (WHO) Framework for Action on  
32 Interprofessional Education and Collaborative Practice, document to address the issue of  
33 interprofessionalism and addresses mechanisms that determine how collaborative practice  
34 is implemented and executed, as institutional mechanisms, work culture and environment  
35 (10). Regarding the main concepts of collaborative processes, D'Amour in his review  
36 describes sharing, partnership, interdependency and power as important factors, such  
37 elements based on the key elements of collaboration, which are the construction of a  
38 collective action and the construction of a team life that integrates the perspectives of  
39 each professional (11). In addition, we will use the determinants of successful  
40 collaboration according to Martín-Rodríguez, which include systematic, organizational  
41 and interactional determinants, such as social and cultural factors, the professional and  
42 the education system, the organizational structure of institutions, the organization's  
43 philosophy, the administrative support, the team resources as the availability of time to  
44 interact and of spaces to meet, the need for adequate financial investments and the  
45 physical proximity of professionals in the workplace, an appropriate coordination and  
46 communication mechanisms, willingness to collaborate, trust, communication and mutual  
47 respect of the professionals (12).  
48  
49  
50  
51  
52  
53  
54  
55  
56  
57  
58  
59  
60

To describe the characteristics related to telehealth, we will use the WHO's concept, which is the provision of health services by professionals in the area, in which distance is a critical factor, using information and communication technology resources for the diagnosis, treatment and prevention of diseases, for research, evaluation and continuing education of health professionals, with the aim of promoting the health of patients and their communities. The use of these resources, although comprehensive, is carried out unevenly throughout the world. Barriers such as high costs, precarious infrastructure and lack of technical knowledge are those found in developing countries. While in developed countries the barriers involve legal issues of privacy and security, priorities of health systems and lack of demand (13). We will also use as a reference the document *Estrategia y Plan de Acción sobre eSalud (2012–2017)* of the Pan American Health Organization (PAHO), which defines telehealth as the use of information and communication technologies to provide health services, especially when distance makes it difficult to provide these services (14).

A preliminary search was carried out in the Open Science Framework (OSF), Cochrane Database of Systematic Reviews, JBI Evidence Synthesis and Epistemonikos databases, and no current or ongoing systematic or scope reviews about the topic were identified, which also corroborates the need to carry out this scope review.

## **METHODS AND ANALYSIS**

This article reports on a protocol of a scoping review following the Joanna Briggs Institute (JBI) methodology for scoping assessments (15) to answer the review question: What are the characteristics and applications of telehealth in relation to interprofessional collaboration among health professionals in the context of Primary Health Care Units? The present protocol followed the Preferred Reporting Items for Systematic Reviews and Meta-Analyses Extension for Protocols (16) (online supplemental appendix I). This protocol of scoping review has been registered in the Open Science Framework (<https://doi.org/10.17605/OSF.IO/2BV8D>).

### **Data sources**

To identify publications in both peer-reviewed and grey literature, and provide a broad overview of the use of telehealth related to collaborative interprofessional practice, we will undertake a scoping review. Although scoping reviews differ from systematic reviews which focus on the effectiveness of a particular intervention, scoping reviews can also follow methodological frameworks, such as the one provided by the Joanna Briggs Institute (15). Relevant peer-reviewed literature will be identified through systematic searched in selected electronic databases: MEDLINE via PubMed, CINAHL, Embase, Eric, Scopus, Latin American and Caribbean Health Science Literature Database (LILACS), Web of Science and grey literature databases such as DART-E, NLTD, Open Access Thesis and Dissertations (OATD).

The search strategy aims to find primary studies, reviews, articles, public policies, protocols, guidelines, grey literature and experience reports. A JBI three-step process will be followed for developing the search. The first of these steps has been already undertaken and involved an initial database search on MEDLINE and CINAHL. This step aimed to capture the index terms used to describe the articles and keywords contained in the title and abstracts of retrieved papers, using the terms telemedicine AND interprofessional practice AND primary health care. A detailed description of this search strategy is available in online supplemental appendix II. A second search using all identified keywords and index terms will then be undertaken across all selected databases (MEDLINE, CINAHL, Embase, Eric, Scopus, Lilacs, Web of Science). The search strategy includes all identified keywords and indexed terms will be adjusted to each database and/or information source included. On the third and final step, the reference lists of the selected studies will be searched for additional studies as well as a search for unpublished studies (grey literature). The search of the grey literature will be undertaken on DART-E, NLTD, Open Access Thesis and Dissertations (OATD) using the terms telemedicine AND interprofessional practice AND primary health care. A search of articles, public policies, protocols and guidelines will be undertaken on Google Scholar and Bielefeld Academic Search Engine (BASE). In these last sources, the first 20 results will be selected and screened.

Articles in portuguese, english, french and italian are going to be considered because the authors' language domain. No restrictions on the publication period will be imposed.

1  
2  
3 The reviewers intend to contact the primary study's authors for more information,  
4 if necessary.  
5  
6

## 7 **Inclusion criteria**

### 8 *Participants*

9  
10  
11 This review will consider studies that include health professionals who participate  
12 in telehealth activities.  
13  
14

### 15 *Concept*

16 We will consider studies that explore telehealth in relation to IPC.  
17  
18

### 19 *Context*

20 This review will include studies carried out in the context of PHC.  
21  
22

### 23 *Types of study to be included*

24 We will include study designs with quantitative, qualitative and mixed methods  
25 approaches.  
26  
27

### 28 *Screening*

29 The titles and abstracts full text of the selected citations will be evaluated by two  
30 independent reviewers. Any disagreements that arise between reviewers in each step of  
31 the selection process will be resolved by discussion with a third reviewer.  
32  
33

## 34 **Data extraction**

35 After the search, all documents identified will be separated into groups and  
36 managed by the EndNote Clarivate Analytics reference manager and any doubled  
37 document will be removed. All records will be imported to Rayyan to recheck duplicates  
38 and perform the blinded selection process (17). Potentially relevant sources will be  
39 retrieved in full, and their citation details imported into the JBI System for Unified  
40 Management Document, Assessment and Review Information (JBI SUMARI) (JBI,  
41 Adelaide, Australia) (18). The reasons for excluding full-text studies that are not in  
42  
43  
44  
45  
46  
47  
48  
49  
50  
51  
52  
53  
54  
55  
56  
57  
58  
59  
60



accordance to the including criteria will be recorded and reported in the scoping review. The research outcome and the including process will be reported in the final scoping review and presented in a flowchart of Preferred Reporting Items for Systematic Reviews and Meta-analyses for Scope Reviews (PRISMA-ScR) (19).

Data will be extracted from documents included in the scoping review using a data extraction tool (table 1) previously developed by the reviewers. The extracted data will include specific details according to the inclusion criteria and that will be relevant to the review question.

The data extraction tool will be modified and reviewed if necessary, during the data extraction process of each included study. Modifications will be detailed in the scoping review. The authors of the articles will be contacted to request missing or additional data, when necessary. As this study consists of a scoping review any evaluation related to methodological quality will be taken.

**Table 1** Data Extraction Tool

| <b>Aspects of extracted data</b>       |                                                                                                                          |
|----------------------------------------|--------------------------------------------------------------------------------------------------------------------------|
| General information                    | Author<br>Title<br>Year of publication<br>Journal<br>Aim of study                                                        |
| Location                               | Country/City of origin                                                                                                   |
| Design of study                        | Empirical research, including quantitative, qualitative or mixed method                                                  |
| Type of population                     | Participants description                                                                                                 |
| Characteristics of the study refers to | Telehealth concept addressed in the study<br>Health care model addressed in the study<br>Interprofessional collaboration |
| Limitations                            | Limitations reported by authors                                                                                          |
| Results                                | Results founded                                                                                                          |
| Relevant aspects                       | Important aspects for the scoping review                                                                                 |

### Strategy for data synthesis

The results will be presented as a data map on a logical way, diagram or tabular format. A narrative abstract will come together with the tabulated and/or mapped results describing how the results on telehealth in relation to interprofessional collaboration among health professionals are related to the purpose of the review and the research question on the characteristics and properties in the context of Primary Health Care Units. Results will be organized into categories.

### Critical appraisal of included studies

The reviewers will perform the critical appraisal of included studies using the Prediction Model Study Risk of Bias Assessment Tool, if applicable. We will classify risk of bias as low risk, high risk or unclear for each domain.

### PATIENT AND PUBLIC INVOLVEMENT

This scoping review has no direct involvement by patients or the general public.

### ETHICS AND DISSEMINATION

A manuscript based on this scoping review will be submitted to a journal and we hope it will contribute to scientific knowledge on the interprofessional field and key research findings will be sent to key events about Interprofessional Practice and Education.

**AUTHOR CONTRIBUTIONS:** GSB, ROV, HLFA, AEH, MP and VML conceived and designed the study and drafted the manuscript, which was edited and revised by all authors. GSB, ROV and VML made a substantial contribution to the conception and the design of the manuscript. GSB and ROV created electronic search strategies and constructed the data extraction tool. HLFA, AEH and MP provided methodological advice on telehealth and interprofessional collaboration and made important intellectual

1  
2  
3 contributions to the manuscript. HLFA, AEH, MP and VML provided supervision. All  
4 authors read and approved the final version of the manuscript.  
5  
6

7  
8 **FUNDING:** This research received no specific grant from any funding agency in the  
9 public, commercial or not-for-profit sectors.  
10

11  
12 **CONFLICTS OF INTERESTS:** The authors declare no conflict of interest in this  
13 research.  
14  
15

## 16 17 18 19 20 **REFERENCES**

- 21  
22 1. Dorsey ER, Topol EJ. State of telehealth. *New England journal of medicine*.  
23 2016;375(2):154-161;  
24
- 25  
26 2. Heuer A, Hector JR, Cassell V. An update on telehealth in allied health and  
27 interprofessional care. *J Allied Health*. 2019;48(2):140–7;  
28
- 29  
30 3. Taylor AM, Bingham J, Schussel K, Axon DR, Dickman DJ, Boesen K, et al.  
31 Integrating innovative telehealth solutions into an interprofessional team-delivered  
32 chronic care management pilot program. *J Manag Care Spec Pharm*.  
33 2018;24(8):813–8;  
34
- 35  
36 4. Morgan S, Pullon S, McKinlay E. Observation of interprofessional collaborative  
37 practice in primary care teams: an integrative literature review. *International*  
38 *journal of nursing studies*. 2015;52(7): 1217-1230;  
39
- 40  
41 5. Reeves S, Xyrichis A, Zwarenstein M. (2018). Teamwork, collaboration,  
42 coordination, and networking: Why we need to distinguish between different types  
43 of interprofessional practice. *Journal of interprofessional care*.2018; 32(1): 1-3;  
44
- 45  
46 6. Tostes JG, da Silva Tostes CB, Cruz RP, de Souza VS, Alves R. Teleconsultation  
47 and the challenges for maintaining health care in times of pandemic. *Revista*  
48 *Ciências em Saúde*. 2021;11(2): 5-9;  
49  
50  
51  
52  
53  
54  
55  
56  
57  
58  
59  
60

- 1  
2  
3 7. Zanotto BS et al. Economic evaluation of a telemedicine service for the expansion  
4 of primary health care in Rio Grande do Sul: the TeleOftalmo Project micro-  
5 funding. *Ciência & Saúde Coletiva*. 2020;25(4):1349- 1360;  
6  
7
- 8  
9 8. Peduzzi M, Agreli H. Teamwork and collaborative practice in Primary Health  
10 Care. *Interface-Comunicação, Saúde, Educação* 2018;22: 1525-1543. DOI:  
11 10.1590/1807-57622017.0827;  
12  
13
- 14  
15 9. Beheshti L, Kalankesh LR, Doshmangir L, Farahbakhsh M. Telehealth in Primary  
16 Health Care: A Scoping Review of the Literature. *Perspect Health Inf Manag*.  
17 2022;19(1):1n;  
18  
19
- 20  
21 10. World Health Organization. Framework for action on interprofessional education  
22 and collaborative practice. Geneva, 2010;  
23  
24
- 25  
26 11. D'amour D, Ferrada-Videla M, San Martin Rodriguez L, Beaulieu MD. The  
27 conceptual basis for interprofessional collaboration: core concepts and theoretical  
28 frameworks. *Journal of interprofessional care*. 2005; 19(sup1): 116-131;  
29  
30
- 31  
32 12. San Martín-Rodríguez L, Beaulieu MD, D'Amour D, Ferrada-Videla M. The  
33 determinants of successful collaboration: a review of theoretical and empirical  
34 studies. *Journal of interprofessional care*.2005; 19(sup1): 132-147;  
35  
36
- 37  
38 13. World Health Organization. National eHealth strategy toolkit. Geneva, 2012;  
39  
40
- 41  
42 14. Pan American Health Organization (PAHO). Estrategia y Plan de acción sobre  
43 eSalud (2012-2017). In: 51 Consejo Directivo CD51/13. Washington, DC, 2011;  
44  
45
- 46  
47 15. Peters MDJ, Godfrey C, McInerney P, Munn Z, Tricco AC, Khalil, H. Chapter 11:  
48 Scoping Reviews (2020 version). In: Aromataris E, Munn Z (Editors). *JBIM Manual*  
49 for Evidence Synthesis, JBI, 2020. Available from:  
50 <https://synthesismanual.jbi.global>. <https://doi.org/10.46658/JBIMES-20-12>;  
51  
52
- 53  
54 16. Moher D, Shamseer L, Clarke M, et al. Preferred reporting items for systematic  
55 review and meta-analysis protocols (PRISMA-P) 2015 statement. *Syst Rev*  
56 2015;4:1;  
57  
58  
59  
60

- 1  
2  
3  
4  
5  
6  
7  
8  
9  
10  
11  
12  
13  
14  
15  
16  
17  
18  
19  
20  
21  
22  
23  
24  
25  
26  
27  
28  
29  
30  
31  
32  
33  
34  
35  
36  
37  
38  
39  
40  
41  
42  
43  
44  
45  
46  
47  
48  
49  
50  
51  
52  
53  
54  
55  
56  
57  
58  
59  
60
17. Ouzzani M, Hammady H, Fedorowicz Z, et al. Rayyan-a web and mobile APP for systematic reviews. *Syst Rev* 2016;5:210;
  18. Munn Z, Aromataris E, Tufanaru C, Stern C, Porritt K, Farrow J, et al. The development of software to support multiple systematic review types: the Joanna Briggs Institute System for the Unified Management, Assessment and Review of Information (JBI SUMARI). *Int J Evid Based Healthc* [Internet]. 2019;17(1):36–43. Disponível em: <https://insights.ovid.com/crossref?an=01787381-201903000-00005>;
  19. Tricco AC, Lillie E, Zarin W, O'Brien KK, Colquhoun H, Levac D, Moher D, Peters MDJ, Horsley T, Weeks L, Hempel S, Akl EA, Chang C, McGowan J, Stewart L, Hartling L, Aldcroft A, Wilson MG, Garritty C, Lewin S, Godfrey CM, Macdonald MT, Langlois EV, Soares-Weiser K, Moriarty J, Clifford T, Tunçalp Ö, Straus SE. PRISMA Extension for Scoping Reviews (PRISMA-ScR): Checklist and Explanation. *Ann Intern Med*. 2018.

**Appendix I - PRISMA-P (Preferred Reporting Items for Systematic review and Meta-Analysis Protocols) 2015 checklist: recommended items to address in a systematic review protocol\***

| <b>Section and topic</b>          | <b>Item No</b> | <b>Checklist item</b>                                                                                                                                                                                                         | <b>Location where item is reported</b> |
|-----------------------------------|----------------|-------------------------------------------------------------------------------------------------------------------------------------------------------------------------------------------------------------------------------|----------------------------------------|
| <b>ADMINISTRATIVE INFORMATION</b> |                |                                                                                                                                                                                                                               |                                        |
| Title:                            |                |                                                                                                                                                                                                                               |                                        |
| Identification                    | 1a             | Identify the report as a protocol of a systematic review                                                                                                                                                                      | <b>Page 1</b>                          |
| Update                            | 1b             | If the protocol is for an update of a previous systematic review, identify as such                                                                                                                                            | <b>Page 4</b>                          |
| Registration                      | 2              | If registered, provide the name of the registry (such as PROSPERO) and registration number                                                                                                                                    | <b>Page 2</b>                          |
| Authors:                          |                |                                                                                                                                                                                                                               |                                        |
| Contact                           | 3a             | Provide name, institutional affiliation, e-mail address of all protocol authors; provide physical mailing address of corresponding author                                                                                     | <b>Page 1</b>                          |
| Contributions                     | 3b             | Describe contributions of protocol authors and identify the guarantor of the review                                                                                                                                           | <b>Page 10</b>                         |
| Amendments                        | 4              | If the protocol represents an amendment of a previously completed or published protocol, identify as such and list changes; otherwise, state plan for documenting important protocol amendments                               | <b>Not applicable</b>                  |
| Support:                          |                |                                                                                                                                                                                                                               |                                        |
| Sources                           | 5a             | Indicate sources of financial or other support for the review                                                                                                                                                                 | <b>Page 10</b>                         |
| Sponsor                           | 5b             | Provide name for the review funder and/or sponsor                                                                                                                                                                             | <b>Not applicable</b>                  |
| Role of sponsor or funder         | 5c             | Describe roles of funder(s), sponsor(s), and/or institution(s), if any, in developing the protocol                                                                                                                            | <b>Not applicable</b>                  |
| <b>INTRODUCTION</b>               |                |                                                                                                                                                                                                                               |                                        |
| Rationale                         | 6              | Describe the rationale for the review in the context of what is already known                                                                                                                                                 | <b>Pages 2, 3 and 4</b>                |
| Objectives                        | 7              | Provide an explicit statement of the question(s) the review will address with reference to participants, interventions, comparators, and outcomes (PICO)                                                                      | <b>Page 4</b>                          |
| <b>METHODS</b>                    |                |                                                                                                                                                                                                                               |                                        |
| Eligibility criteria              | 8              | Specify the study characteristics (such as PICO, study design, setting, time frame) and report characteristics (such as years considered, language, publication status) to be used as criteria for eligibility for the review | <b>Page 6</b>                          |
| Information sources               | 9              | Describe all intended information sources (such as electronic databases, contact with study authors, trial registers or other grey literature sources) with planned dates of coverage                                         | <b>Page 5</b>                          |
| Search strategy                   | 10             | Present draft of search strategy to be used for at least one electronic database, including planned limits, such that it could be repeated                                                                                    | <b>online supplemental Appendix I</b>  |
| Study records:                    |                |                                                                                                                                                                                                                               |                                        |
| Data management                   | 11a            | Describe the mechanism(s) that will be used to manage records and data throughout the review                                                                                                                                  | <b>Pages 6 and 7</b>                   |

|                                    |     |                                                                                                                                                                                                                                                  |                       |
|------------------------------------|-----|--------------------------------------------------------------------------------------------------------------------------------------------------------------------------------------------------------------------------------------------------|-----------------------|
| Selection process                  | 11b | State the process that will be used for selecting studies (such as two independent reviewers) through each phase of the review (that is, screening, eligibility and inclusion in meta-analysis)                                                  | <b>Page 6</b>         |
| Data collection process            | 11c | Describe planned method of extracting data from reports (such as piloting forms, done independently, in duplicate), any processes for obtaining and confirming data from investigators                                                           | <b>Pages 6 and 7</b>  |
| Data items                         | 12  | List and define all variables for which data will be sought (such as PICO items, funding sources), any pre-planned data assumptions and simplifications                                                                                          | <b>Page 7</b>         |
| Outcomes and prioritization        | 13  | List and define all outcomes for which data will be sought, including prioritization of main and additional outcomes, with rationale                                                                                                             | <b>Page 8</b>         |
| Risk of bias in individual studies | 14  | Describe anticipated methods for assessing risk of bias of individual studies, including whether this will be done at the outcome or study level, or both; state how this information will be used in data synthesis                             | <b>Page 8</b>         |
| Data synthesis                     | 15a | Describe criteria under which study data will be quantitatively synthesised                                                                                                                                                                      | <b>Not applicable</b> |
|                                    | 15b | If data are appropriate for quantitative synthesis, describe planned summary measures, methods of handling data and methods of combining data from studies, including any planned exploration of consistency (such as $I^2$ , Kendall's $\tau$ ) | <b>Not applicable</b> |
|                                    | 15c | Describe any proposed additional analyses (such as sensitivity or subgroup analyses, meta-regression)                                                                                                                                            | <b>Not applicable</b> |
|                                    | 15d | If quantitative synthesis is not appropriate, describe the type of summary planned                                                                                                                                                               | <b>Page 8</b>         |
| Meta-bias(es)                      | 16  | Specify any planned assessment of meta-bias(es) (such as publication bias across studies, selective reporting within studies)                                                                                                                    | <b>Not applicable</b> |
| Confidence in cumulative evidence  | 17  | Describe how the strength of the body of evidence will be assessed (such as GRADE)                                                                                                                                                               | <b>Not applicable</b> |

**\* It is strongly recommended that this checklist be read in conjunction with the PRISMA-P Explanation and Elaboration (cite when available) for important clarification on the items. Amendments to a review protocol should be tracked and dated. The copyright for PRISMA-P (including checklist) is held by the PRISMA-P Group and is distributed under a Creative Commons Attribution Licence 4.0.**

*From: Shamseer L, Moher D, Clarke M, Ghersi D, Liberati A, Petticrew M, Shekelle P, Stewart L, PRISMA-P Group. Preferred reporting items for systematic review and meta-analysis protocols (PRISMA-P) 2015: elaboration and explanation. BMJ. 2015 Jan 2;349(jan02 1):g7647.*

## Appendix II - Search strategy:

| Database | Search strategy                                                                                                                                                                                                                                                                                                                                                                                                                                                                                                                                                                                                                                                                                                                                                                                                                                                                                                                                                                                                                                                                                                                                                                                                                                                                                       |
|----------|-------------------------------------------------------------------------------------------------------------------------------------------------------------------------------------------------------------------------------------------------------------------------------------------------------------------------------------------------------------------------------------------------------------------------------------------------------------------------------------------------------------------------------------------------------------------------------------------------------------------------------------------------------------------------------------------------------------------------------------------------------------------------------------------------------------------------------------------------------------------------------------------------------------------------------------------------------------------------------------------------------------------------------------------------------------------------------------------------------------------------------------------------------------------------------------------------------------------------------------------------------------------------------------------------------|
| CINAHL   | (MH "Telehealth") OR TI ( telehealth or telemedicine or telemonitoring or telepractice or telenursing or telecare or ehealth or e-health or mhealth or "digital health" or technology or "remote consultation") OR AB ( telehealth or telemedicine or telemonitoring or telepractice or telenursing or telecare or ehealth or e-health or mhealth or "digital health" or technology OR "remote consultation") AND (MH "Interprofessional Relations") OR TI ( "interprofessional collaboration" or "interprofessional teamwork" or "interprofessional practice" OR "interdisciplinary practice" OR "Interprofessional care" OR "interprofessional relations" OR "interprofessional team" ) OR AB ( "interprofessional collaboration" or "interprofessional teamwork" or "interprofessional practice" OR "interdisciplinary practice" OR "Interprofessional care" OR "interprofessional relations" OR "interprofessional team" ) AND (MH "Primary Health Care") OR TI ( "primary health care" or "primary care" OR "primary healthcare" or "primary care nursing" or "family medicine" or "family practice" or "general medicine" ) OR AB ( "primary health care" or "primary care" OR "primary healthcare" or "primary care nursing" or "family medicine" or "family practice" or "general medicine" ) |
| PubMed   | ((((("Remote Consultation"[Mesh] Consultation, Remote Teleconsultation Teleconsultations) OR ("Telemedicine"[Mesh] Mobile Health Health, Mobile mHealth Telehealth eHealth)) OR (telemonitoring or telepractice or telenursing or telecare or ehealth or e-health or mhealth or "digital health" or technology)) AND (("Interprofessional Relations"[Mesh] Relations, Interprofessional) OR ("interprofessional collaboration" or "interprofessional teamwork" or "interprofessional practice" OR "interdisciplinary practice" OR "Interprofessional care" OR "interprofessional relations" OR "interprofessional team")) AND ("Primary                                                                                                                                                                                                                                                                                                                                                                                                                                                                                                                                                                                                                                                               |



|  |                                                                                                                                                                                                                                                                  |
|--|------------------------------------------------------------------------------------------------------------------------------------------------------------------------------------------------------------------------------------------------------------------|
|  | Health Care"[Mesh] OR "Primary Health Care"[tw] OR Care, Primary Health<br>Health Care, Primary Primary Healthcare Healthcare, Primary Primary Care<br>Care, Primary "primary care nursing" or "family medicine" or "family<br>practice" or "general medicine")) |
|--|------------------------------------------------------------------------------------------------------------------------------------------------------------------------------------------------------------------------------------------------------------------|

For peer review only
