# Supplementary material for: Telehealth use in primary healthcare collaborative interprofessional practice: protocol for a scoping review
Source: PubMed Central journal article supplement — BMJ Open. 2023 Mar 17;13(3):e069163. doi: 10.1136/bmjopen-2022-069163 (PMC10030669; doi:10.1136/bmjopen-2022-069163), 2023-03-17
Supplement: bmjopen-2022-069163.reviewer_comments.pdf [file bmjopen-2022-069163.reviewer_comments.pdf]

## PEER REVIEW HISTORY

BMJ Open publishes all reviews undertaken for accepted manuscripts. Reviewers are asked to complete a checklist review form (<http://bmjopen.bmj.com/site/about/resources/checklist.pdf>) and are provided with free text boxes to elaborate on their assessment. These free text comments are reproduced below.

### ARTICLE DETAILS

|                            |                                                                                                                    |
|----------------------------|--------------------------------------------------------------------------------------------------------------------|
| <b>TITLE (PROVISIONAL)</b> | Telehealth use in Primary Health Care collaborative interprofessional practice: protocol for a scoping review      |
| <b>AUTHORS</b>             | Belber, Gisele; Vasconcelos, Raíssa; Agreli, Heloise; Haddad, Ana Estela; Peduzzi, Marina; Leonello, Valéria Marli |

### VERSION 1 – REVIEW

|                        |                                                               |
|------------------------|---------------------------------------------------------------|
| <b>REVIEWER</b>        | Breton, Mylaine<br>University of Sherbrooke, Community Health |
| <b>REVIEW RETURNED</b> | 20-Nov-2022                                                   |

|                         |                                                                                                                                                                                                                                                                                                                                                                                                                                                                                                                                                                                                                                                                                                                                                                                                                                                                                                                                                                                                                                     |
|-------------------------|-------------------------------------------------------------------------------------------------------------------------------------------------------------------------------------------------------------------------------------------------------------------------------------------------------------------------------------------------------------------------------------------------------------------------------------------------------------------------------------------------------------------------------------------------------------------------------------------------------------------------------------------------------------------------------------------------------------------------------------------------------------------------------------------------------------------------------------------------------------------------------------------------------------------------------------------------------------------------------------------------------------------------------------|
| <b>GENERAL COMMENTS</b> | <p>Scoping – Telehealth use in PHC care collaborative interprofessional practice</p> <p>Introduction<br/>Very well written. The relevance of the study is well presented and justified.<br/>The concept of interprofessional collaborations could be defined.<br/>What are the major scientific writings on interprofessional collaboration?<br/>How the authors define « the characteristics” related to the use of telehealth in the context of interprofessional collaboration?<br/>How to describe the characteristics related to the telehealth concept?<br/>How to describe the characteristics related to interprofessional collaboration</p> <p>Methods<br/>Very well detailed. The authors present all the important information to conduct a scoping review.<br/>Strategy for data synthesis<br/>The authors could specify the information related to the theme under study and the research question « describing how the results on xxx – are related to the purpose of the review and the research question on xxx</p> |
|-------------------------|-------------------------------------------------------------------------------------------------------------------------------------------------------------------------------------------------------------------------------------------------------------------------------------------------------------------------------------------------------------------------------------------------------------------------------------------------------------------------------------------------------------------------------------------------------------------------------------------------------------------------------------------------------------------------------------------------------------------------------------------------------------------------------------------------------------------------------------------------------------------------------------------------------------------------------------------------------------------------------------------------------------------------------------|

|                        |                                                                 |
|------------------------|-----------------------------------------------------------------|
| <b>REVIEWER</b>        | Shoemaker, Margrit<br>Geisinger Commonwealth School of Medicine |
| <b>REVIEW RETURNED</b> | 30-Nov-2022                                                     |

|                         |                                                    |
|-------------------------|----------------------------------------------------|
| <b>GENERAL COMMENTS</b> | Thank you for tackling this needed scoping review. |
|-------------------------|----------------------------------------------------|

## VERSION 1 – AUTHOR RESPONSE

**Reviewer 1, Dr. Mylaine Breton comment:** Methods: very well detailed. The authors present all the important information to conduct a scoping review. Strategy for data synthesis: the authors could specify the information related to the theme under study and the research question « describing how the results on xxx – are related to the purpose of the review and the research question on xxx.

**Authors' response:** We rewrote part of the paragraph in the “Strategy for data synthesis” section, as suggested.

**Reviewer 2, Margrit Shoemaker comment:** thank you for tackling this needed scoping review.

**Authors' response:** Thank you very much. We appreciate your interest in our paper.

Sincerely,

MSc and PhD Student Gisele Silvestre Belber and Professor Valéria Marli Leonello
