# Supplementary material for: Telehealth use in primary healthcare collaborative interprofessional practice: protocol for a scoping review
Source: PubMed Central journal article supplement — BMJ Open. 2023 Mar 17;13(3):e069163. doi: 10.1136/bmjopen-2022-069163 (PMC10030669; doi:10.1136/bmjopen-2022-069163), 2023-03-17
Supplement: bmjopen-2022-069163supp002.pdf [file bmjopen-2022-069163supp002.pdf]

## Appendix II - Search strategy:

| Database | Search strategy                                                                                                                                                                                                                                                                                                                                                                                                                                                                                                                                                                                                                                                                                                                                                                                                                                                                                                                                                                                                                                                                                                                                                                                                                                                                                       |
|----------|-------------------------------------------------------------------------------------------------------------------------------------------------------------------------------------------------------------------------------------------------------------------------------------------------------------------------------------------------------------------------------------------------------------------------------------------------------------------------------------------------------------------------------------------------------------------------------------------------------------------------------------------------------------------------------------------------------------------------------------------------------------------------------------------------------------------------------------------------------------------------------------------------------------------------------------------------------------------------------------------------------------------------------------------------------------------------------------------------------------------------------------------------------------------------------------------------------------------------------------------------------------------------------------------------------|
| CINAHL   | (MH "Telehealth") OR TI ( telehealth or telemedicine or telemonitoring or telepractice or telenursing or telecare or ehealth or e-health or mhealth or "digital health" or technology or "remote consultation") OR AB ( telehealth or telemedicine or telemonitoring or telepractice or telenursing or telecare or ehealth or e-health or mhealth or "digital health" or technology OR "remote consultation") AND (MH "Interprofessional Relations") OR TI ( "interprofessional collaboration" or "interprofessional teamwork" or "interprofessional practice" OR "interdisciplinary practice" OR "Interprofessional care" OR "interprofessional relations" OR "interprofessional team" ) OR AB ( "interprofessional collaboration" or "interprofessional teamwork" or "interprofessional practice" OR "interdisciplinary practice" OR "Interprofessional care" OR "interprofessional relations" OR "interprofessional team" ) AND (MH "Primary Health Care") OR TI ( "primary health care" or "primary care" OR "primary healthcare" or "primary care nursing" or "family medicine" or "family practice" or "general medicine" ) OR AB ( "primary health care" or "primary care" OR "primary healthcare" or "primary care nursing" or "family medicine" or "family practice" or "general medicine" ) |
| PubMed   | ((((("Remote Consultation"[Mesh] Consultation, Remote Teleconsultation Teleconsultations) OR ("Telemedicine"[Mesh] Mobile Health Health, Mobile mHealth Telehealth eHealth)) OR (telemonitoring or telepractice or telenursing or telecare or ehealth or e-health or mhealth or "digital health" or technology)) AND (("Interprofessional Relations"[Mesh] Relations, Interprofessional) OR ("interprofessional collaboration" or "interprofessional teamwork" or "interprofessional practice" OR "interdisciplinary practice" OR "Interprofessional care" OR "interprofessional relations" OR "interprofessional team")) AND ("Primary                                                                                                                                                                                                                                                                                                                                                                                                                                                                                                                                                                                                                                                               |

|  |                                                                                                                                                                                                                                                         |
|--|---------------------------------------------------------------------------------------------------------------------------------------------------------------------------------------------------------------------------------------------------------|
|  | Health Care"[Mesh] OR "Primary Health Care"[tw] OR Care, Primary Health Health Care, Primary Primary Healthcare Healthcare, Primary Primary Care Care, Primary "primary care nursing" or "family medicine" or "family practice" or "general medicine")) |
|--|---------------------------------------------------------------------------------------------------------------------------------------------------------------------------------------------------------------------------------------------------------|
